# Supplementary material
Source: PubMed Central journal article supplement (PMC3438930)
Supplement: supp_M112.374306_jbc.M112.374306-1.pdf [file supp_M112.374306_jbc.M112.374306-1.pdf]

## SUPPLEMENTAL DATA

Structure and catalytic mechanism of 3-ketosteroid- $\Delta^4$ -(5 $\alpha$ )-dehydrogenase ( $\Delta^4$ -(5 $\alpha$ )-KSTD)  
from *Rhodococcus jostii* RHA1\*

**Niels van Oosterwijk<sup>1,2</sup>, Jan Knol<sup>1,3</sup>, Lubbert Dijkhuizen<sup>3</sup>, Robert van der Geize<sup>3</sup> and  
Bauke W. Dijkstra<sup>2</sup>**

*<sup>2</sup>Laboratory of Biophysical Chemistry and <sup>3</sup>Department of Microbiology, Groningen  
Biomolecular Sciences and Biotechnology Institute (GBB), University of Groningen,  
Nijenborgh 7, 9747 AG Groningen, The Netherlands*

### TABLE OF CONTENTS

- Supplemental Figure 1
- Supplemental Figure 2
- Supplemental Figure 3
- Supplemental Table I

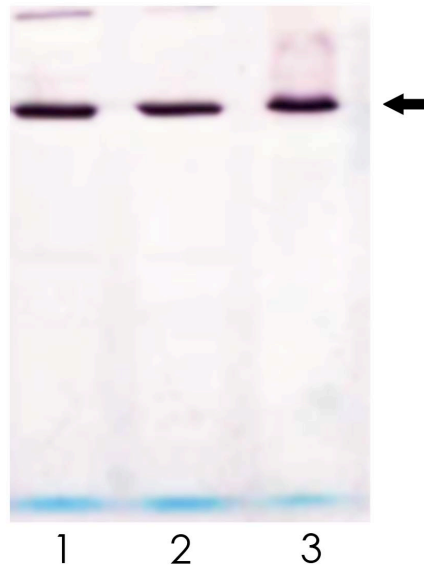

### Supplemental Figure 1

Activity-stained native PAGE gel of  $\Delta^4$ -(5 $\alpha$ )-KSTDs from *R. erythropolis* SQ1 (lane 1), *R. rhodochrous* DSM43269 (lane 2) and *R. jostii* RHA1 (lane 3).  $\Delta^4$ -(5 $\alpha$ )-KSTD activity was visualized (black arrow) by incubating a native PAGE gel loaded with cell-free extracts (30-50  $\mu$ g of protein) in a Tris-HCl buffer containing the electron acceptors phenazine methosulphate and nitro blue tetrazolium, as well as the substrate 1-(5 $\alpha$ )-androstene-3,17-dione (1-(5 $\alpha$ )-AD).

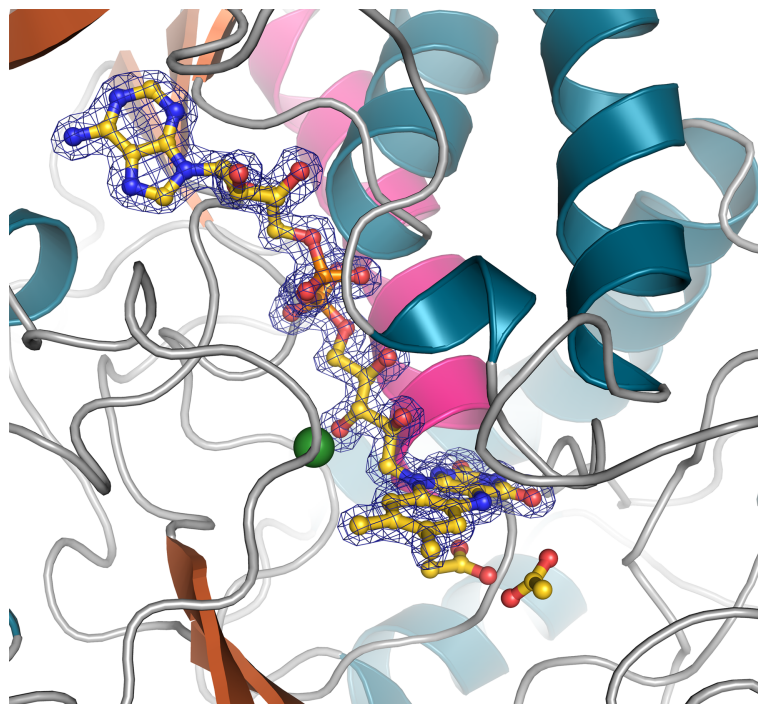

**Supplemental Figure 2**

FAD binding in  $\Delta 4-(5\alpha)$ -KSTD. The electron density around the FAD is shown at  $1\sigma$ . The C-terminal helix, which is thought to provide a helix dipole moment important for the reaction, is shown in pink. The FAD and acetate molecules are yellow and the chloride ion is shown in green.

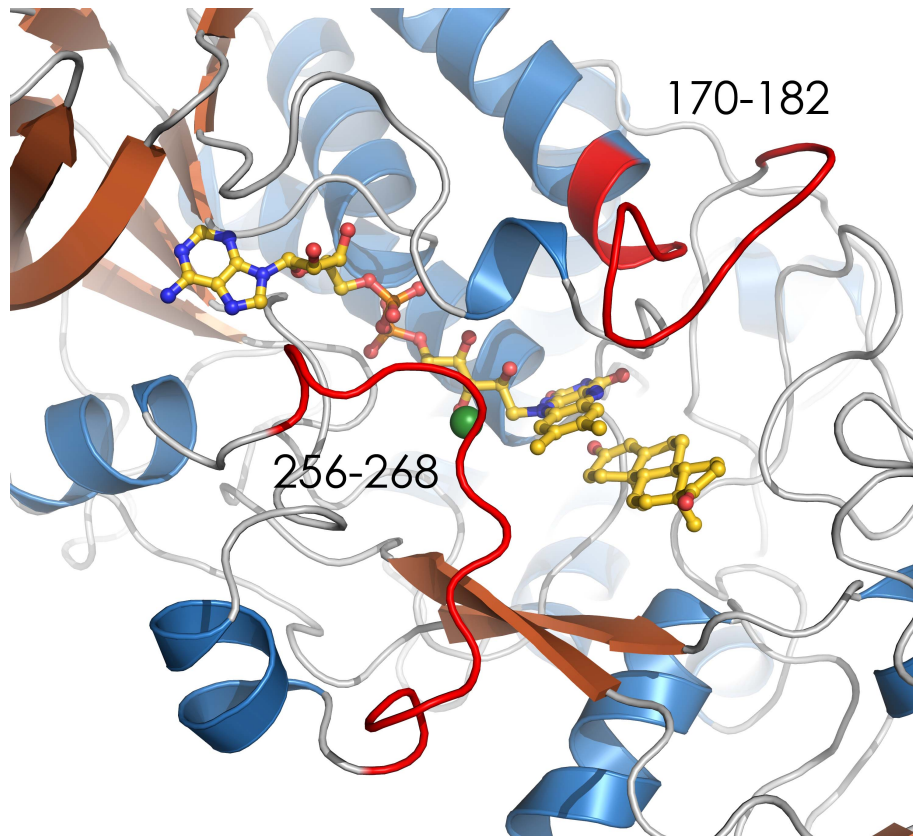

**Supplemental Figure 3**

Two loops (residues 170-182 and 256-268, shown in red) close to the active site. Both show less well-defined electron density, which suggests flexibility of these loops. The FAD and 4AD are shown in yellow and the chloride ion in green.

**Supplemental Table I – Sequences of sense primers for site-directed mutagenesis**  
The mutated nucleotides and corresponding amino acids are printed in bold.

| Mutation | Primer |     |     |     |     |            |     |     |     |     |     |
|----------|--------|-----|-----|-----|-----|------------|-----|-----|-----|-----|-----|
| W136A    | tgg    | ggc | gaa | ccc | gga | <b>gcg</b> | gaa | ccc | ccg | ttc | gac |
|          | W      | G   | E   | P   | G   | <b>A</b>   | E   | P   | P   | F   | D   |
| W136F    | gg     | ggc | gaa | ccc | gga | <b>ttc</b> | gaa | ccc | ccg | ttc | gac |
|          |        | G   | E   | P   | G   | <b>F</b>   | E   | P   | P   | F   | D   |
| Y319F    | gtt    | ccg | gag | gac | acc | <b>ttc</b> | tcc | ggg | cgg | atc | gg  |
|          | V      | P   | E   | D   | T   | <b>F</b>   | S   | G   | R   | I   |     |
| Y466A    | gtg    | tgc | gcg | ggc | ggc | <b>gcc</b> | gcc | agc | ggc | acc | tcg |
|          | V      | C   | A   | G   | G   | <b>A</b>   | A   | S   | G   | T   | S   |
| Y466F    | gtg    | tgc | gcg | ggc | ggc | <b>ttc</b> | gcc | agc | ggc | acc | tcg |
|          | V      | C   | A   | G   | G   | <b>F</b>   | A   | S   | G   | T   | S   |
| S468T    | gcg    | ggc | ggc | tac | gcc | <b>acc</b> | ggc | acc | tcg | ctc | gg  |
|          | A      | G   | G   | Y   | A   | <b>T</b>   | G   | T   | S   | L   |     |
